# Supplementary material for: Differential Contribution of P5CS Isoforms to Stress Tolerance in Arabidopsis
Source: PubMed Central journal article supplement (PMC7545825; doi:10.3389/fpls.2020.565134), 2020-09-25
Supplement: DataSheet_1.pdf [file DataSheet_1.pdf]

### Supplementary Table S1: Statistical analyses of germination and establishment

Binomial generalized linear mixed models were used to compare different genotypes among each other as well as their response to the different media (Figures 2, 3 and Supplementary Figure S2). Germination and establishment of wildtype and *p5cs1-4* seedlings were too close to 100% to be included in the statistical analyses.

| Influence of 0, 2, or 10 mM proline on germination of <i>p5cs2</i> mutants (Figures 2, S2)   |                                  |                  |                  |                | Influence of 0, 50, 100, or 200 mM NaCl on germination of <i>p5cs2</i> mutants (Figures 2, S2) |                 |                  |                  |         |  |
|----------------------------------------------------------------------------------------------|----------------------------------|------------------|------------------|----------------|------------------------------------------------------------------------------------------------|-----------------|------------------|------------------|---------|--|
| Source of Variation                                                                          | DF <sup>a</sup>                  | AIC <sup>b</sup> | LRT <sup>c</sup> | p-value        | Source of Variation                                                                            | DF <sup>a</sup> | AIC <sup>b</sup> | LRT <sup>c</sup> | p-value |  |
| Supplement                                                                                   | 2                                | 157.1            | 1.64             | 0.44           | Supplement                                                                                     | 3               | 298.5            | 23.89            | <0.001  |  |
| Genotype ( <i>p5cs2-1</i> vs <i>p5cs2-2</i> )                                                | 1                                | 170.3            | 12.84            | <0.001         | Genotype ( <i>p5cs2-1</i> vs <i>p5cs2-2</i> )                                                  | 1               | 284.6            | 5.96             | 0.02    |  |
| Supplement x genotype                                                                        | 2                                | 159.5            | 0.35             | 0.84           | Supplement x genotype                                                                          | 3               | 280.6            | 21.93            | <0.001  |  |
| Pairwise comparisons with General Linear Hypotheses                                          |                                  |                  |                  |                |                                                                                                |                 |                  |                  |         |  |
| Fixed factor                                                                                 | comparison                       | z-value          | p-value          | Fixed factor   | comparison                                                                                     | z-value         | p-value          |                  |         |  |
| 0 mM proline                                                                                 | <i>p5cs2-1</i> vs <i>p5cs2-2</i> | -2.47            | 0.04             | <i>p5cs2-1</i> | 0 vs 50 mM NaCl                                                                                | -1.59           | 0.40             |                  |         |  |
| 2 mM proline                                                                                 |                                  | -1.52            | 0.34             | <i>p5cs2-2</i> |                                                                                                | 0.78            | 0.92             |                  |         |  |
| 10 mM proline                                                                                |                                  | -2.14            | 0.09             | <i>p5cs2-1</i> | 0 vs 100 mM NaCl                                                                               | -4.09           | <0.001           |                  |         |  |
|                                                                                              |                                  |                  |                  | <i>p5cs2-2</i> |                                                                                                | -1.92           | 0.22             |                  |         |  |
|                                                                                              |                                  |                  |                  | <i>p5cs2-1</i> | 0 vs 200 mM NaCl                                                                               | -7.69           | <0.001           |                  |         |  |
|                                                                                              |                                  |                  |                  | <i>p5cs2-2</i> |                                                                                                | -4.29           | <0.001           |                  |         |  |
| Influence of 0, 2, or 10 mM proline on establishment of <i>p5cs2</i> mutants (Figures 3, S2) |                                  |                  |                  |                | Influence of 0, 50 or 100 mM NaCl on establishment of <i>p5cs2</i> mutants (Figure 3)          |                 |                  |                  |         |  |
| Source of Variation                                                                          | DF <sup>a</sup>                  | AIC <sup>b</sup> | LRT <sup>c</sup> | p-value        | Source of Variation                                                                            | DF <sup>a</sup> | AIC <sup>b</sup> | LRT <sup>c</sup> | p-value |  |
| Supplement                                                                                   | 2                                | 199.3            | 22.01            | <0.001         | Supplement                                                                                     | 2               | 199.3            | 12.21            | 0.002   |  |
| Genotype ( <i>p5cs2-1</i> vs <i>p5cs2-2</i> )                                                | 1                                | 183.0            | 3.71             | 0.054          | Genotype ( <i>p5cs2-1</i> vs <i>p5cs2-2</i> )                                                  | 1               | 223.2            | 34.11            | <0.001  |  |
| Supplement x genotype                                                                        | 2                                | 181.3            | 13.82            | <0.001         | Supplement x genotype                                                                          | 2               | 191.1            | 0.26             | 0.88    |  |
| Pairwise comparisons with General Linear Hypotheses                                          |                                  |                  |                  |                |                                                                                                |                 |                  |                  |         |  |
| Fixed factor                                                                                 | comparison                       | z-value          | p-value          | Fixed factor   | comparison                                                                                     | z-value         | p-value          |                  |         |  |
| 0 mM proline                                                                                 | <i>p5cs2-1</i> vs <i>p5cs2-2</i> | 3.77             | <0.01            | 0 mM NaCl      | <i>p5cs2-1</i> vs <i>p5cs2-2</i>                                                               | 3.77            | <0.01            |                  |         |  |
| 2 mM proline                                                                                 |                                  | -1.58            | 0.49             | 50 mM NaCl     |                                                                                                |                 | 3.61             | <0.01            |         |  |
| 10 mM proline                                                                                |                                  | -0.70            | 0.97             | 100 mM NaCl    |                                                                                                |                 | 2.48             | 0.08             |         |  |
| <i>p5cs2-1</i>                                                                               | 0 vs 2 mM proline                | 7.19             | <0.001           | <i>p5cs2-1</i> | 0 vs 50 mM NaCl                                                                                | 3.72            | <0.01            |                  |         |  |
| <i>p5cs2-2</i>                                                                               |                                  | 5.03             | <0.001           | <i>p5cs2-2</i> | NaCl                                                                                           | 3.58            | <0.01            |                  |         |  |
| <i>p5cs2-1</i>                                                                               | 0 vs 10 mM proline               | 6.71             | <0.001           | <i>p5cs2-1</i> | 0 vs 100 mM NaCl                                                                               | 3.82            | <0.001           |                  |         |  |
| <i>p5cs2-2</i>                                                                               |                                  | 4.64             | <0.001           | <i>p5cs2-2</i> | NaCl                                                                                           | 3.39            | <0.01            |                  |         |  |

<sup>a</sup> Degrees of freedom

<sup>b</sup> Akaike information criterion

<sup>c</sup> Likelihood ratio test

## Supplementary Table S2: Statistical analyses of root length

The effects of proline and NaCl on root growth of wildtype and mutant genotypes were assessed by a Gaussian linear mixed model (Figure 4 and Supplementary Figure S3).

| Influence of 0 or 2 mM proline and 0 or 150 mM NaCl on root length (Figures 4, S3) |                         |                 |                  |                  |                                     |         |                  |
|------------------------------------------------------------------------------------|-------------------------|-----------------|------------------|------------------|-------------------------------------|---------|------------------|
| Source of Variation                                                                |                         | DF <sup>a</sup> | AIC <sup>b</sup> | LRT <sup>c</sup> | p-value                             |         |                  |
| Proline <sup>d</sup>                                                               |                         | 1               | 2007.5           | 2.12             | 0.15                                |         |                  |
| NaCl <sup>d</sup>                                                                  |                         | 1               | 2006.0           | 0.60             | 0.445                               |         |                  |
| Genotype                                                                           |                         | 3               | 2028.0           | 26.61            | <b>&lt;0.001</b>                    |         |                  |
| Genotype x proline                                                                 |                         | 3               | 1930.3           | 46.46            | <b>&lt;0.001</b>                    |         |                  |
| Genotype x NaCl                                                                    |                         | 3               | 1973.6           | 89.83            | <b>&lt;0.001</b>                    |         |                  |
| Proline x NaCl                                                                     |                         | 1               | 1889.9           | 2.15             | 0.14                                |         |                  |
| Genotype x proline x NaCl                                                          |                         | 3               | 1889.8           | 99.58            | <b>&lt;0.001</b>                    |         |                  |
| Pairwise comparisons within fixed factors with General Linear Hypotheses           |                         |                 |                  |                  |                                     |         |                  |
| Fixed factor                                                                       | comparison              | z-value         | p-value          | Fixed factor     | Treatment compared to 0 Pro, 0 NaCl | z-value | p-value          |
| 0 Pro, 0 NaCl                                                                      | Col-0 vs <i>p5cs1-4</i> | -0.42           | 0.96             | Col-0            | 2 Pro, 0 NaCl                       | 2.84    | <b>0.01</b>      |
|                                                                                    | Col-0 vs <i>p5cs2-1</i> | 17.17           | <b>&lt;0.001</b> |                  | 0 Pro, 150 NaCl                     | 4.75    | <b>&lt;0.001</b> |
|                                                                                    | Col-0 vs <i>p5cs2-2</i> | 18.94           | <b>&lt;0.001</b> |                  | 2 Pro, 150 NaCl                     | 3.73    | <b>&lt;0.001</b> |
| 2 Pro, 0 NaCl                                                                      | Col-0 vs <i>p5cs1-4</i> | 0.55            | 0.91             | <i>p5cs1-4</i>   | 2 Pro, 0 NaCl                       | 3.22    | <b>&lt;0.01</b>  |
|                                                                                    | Col-0 vs <i>p5cs2-1</i> | -0.50           | 0.93             |                  | 0 Pro, 150 NaCl                     | 5.94    | <b>&lt;0.001</b> |
|                                                                                    | Col-0 vs <i>p5cs2-2</i> | 0.42            | 0.95             |                  | 2 Pro, 150 NaCl                     | 3.21    | <b>&lt;0.01</b>  |
| 0 Pro, 150 NaCl                                                                    | Col-0 vs <i>p5cs1-4</i> | 2.44            | <b>0.04</b>      | <i>p5cs2-1</i>   | 2 Pro, 0 NaCl                       | -3.09   | <b>&lt;0.01</b>  |
|                                                                                    | Col-0 vs <i>p5cs2-1</i> | 0.14            | 1.00             |                  | 0 Pro, 150 NaCl                     | -2.12   | 0.09             |
|                                                                                    | Col-0 vs <i>p5cs2-2</i> | -2.05           | 0.11             |                  | 2 Pro, 150 NaCl                     | -3.99   | <b>&lt;0.001</b> |
| 2 Pro, 150 NaCl                                                                    | Col-0 vs <i>p5cs1-4</i> | -1.32           | 0.42             | <i>p5cs2-2</i>   | 2 Pro, 0 NaCl                       | -3.01   | <b>&lt;0.01</b>  |
|                                                                                    | Col-0 vs <i>p5cs2-1</i> | -1.81           | 0.18             |                  | 0 Pro, 150 NaCl                     | -3.46   | <b>&lt;0.01</b>  |
|                                                                                    | Col-0 vs <i>p5cs2-2</i> | -3.09           | <b>&lt;0.01</b>  |                  | 2 Pro, 150 NaCl                     | -4.92   | <b>&lt;0.001</b> |

<sup>a</sup> Degrees of freedom

<sup>b</sup> Akaike information criterion

<sup>c</sup> Likelihood ratio test

<sup>d</sup> Overall effects of proline and NaCl were not significant, because the different genotypes responded in opposite directions

**Supplementary Table S3: Statistical analyses of bacterial titers after infection with virulent or avirulent *Pseudomonas syringae* pv tomato DC3000 bacteria**

**(A)** One-way ANOVA and of bacterial titers 0, 2 and 4 days after infection with virulent bacteria (Supplementary Figure S5A)

| Source of variation | Degrees of freedom | Sum of squares |          |          | Mean squares |          |          | F-value |       |       | p-value |       |       |
|---------------------|--------------------|----------------|----------|----------|--------------|----------|----------|---------|-------|-------|---------|-------|-------|
|                     |                    | Day 0          | Day 2    | Day 4    | Day 0        | Day 2    | Day 4    | Day 0   | Day 2 | Day 4 | Day 0   | Day 2 | Day 4 |
| Time                |                    |                |          |          |              |          |          |         |       |       |         |       |       |
| Genotype            | 3                  | 2.29E+08       | 3.61E+14 | 2.74E+13 | 7.63E+07     | 1.20E+14 | 9.13E+12 | 3.15    | 1.01  | 2.05  | 0.07    | 0.42  | 0.16  |
| Error               | 12                 | 2.91E+08       | 1.42E+15 | 5.33E+13 | 2.43E+07     | 1.19E+14 | 4.44E+12 |         |       |       |         |       |       |
| Total               | 15                 | 5.20E+08       | 1.79E+15 | 8.07E+13 |              |          |          |         |       |       |         |       |       |

**(B)** One-way ANOVA of bacterial titers 4 days after infection with avirulent, RPM1-expressing, bacteria (Supplementary Figure S5B)

| Source of variation | Degrees of freedom | Sum of squares |          |          | Mean squares |          |          | F-value |       |       | p-value |       |                 |
|---------------------|--------------------|----------------|----------|----------|--------------|----------|----------|---------|-------|-------|---------|-------|-----------------|
|                     |                    | Day 0          | Day 2    | Day 4    | Day 0        | Day 2    | Day 4    | Day 0   | Day 2 | Day 4 | Day 0   | Day 2 | Day 4           |
| Time                |                    |                |          |          |              |          |          |         |       |       |         |       |                 |
| Genotype            | 2                  | 7.38E+06       | 4.69E+11 | 1.16E+13 | 3.69E+06     | 2.34E+11 | 5.79E+12 | 1.05    | 3.40  | 9.89  | 0.39    | 0.08  | <b>&lt;0.01</b> |
| Error               | 9                  | 3.17E+07       | 6.21E+11 | 5.27E+12 | 3.53E+06     | 6.90E+10 | 5.86E+11 |         |       |       |         |       |                 |
| Total               | 11                 | 3.91E+07       | 1.09E+12 | 1.69E+13 |              |          |          |         |       |       |         |       |                 |

**(C)** Pairwise comparisons of bacterial titers 4 days after infection with avirulent, RPM1-expressing, bacteria with Tukey's HSD test

| Genotype pair                     | q-value | p-value         |
|-----------------------------------|---------|-----------------|
| Col-0 vs. <i>p5cs1-4</i>          | 4.23    | <b>0.04</b>     |
| Col-0 vs. <i>p5cs2-1</i>          | 1.93    | 0.40            |
| <i>p5cs1-4</i> vs. <i>p5cs2-1</i> | 6.16    | <b>&lt;0.01</b> |

**Supplementary Table S4A: Statistical analyses of solutes in mature rosette leaves of wildtype plants and *p5cs1* or *p5cs2* mutants under non-stressed and stressed conditions.**

| Source of Variation                                               | Degrees of freedom           | Sum of squares | Mean squares | F-value | p-value |
|-------------------------------------------------------------------|------------------------------|----------------|--------------|---------|---------|
| <b>2-way ANOVA of proline content<sup>a</sup> (Figure 7A)</b>     |                              |                |              |         |         |
| Treatment                                                         | 1                            | 11.26          | 11.26        | 423.2   | <0.001  |
| Genotype                                                          | 2                            | 1.54           | 0.77         | 29.0    | <0.001  |
| Genotype x treatment                                              | 2                            | 0.02           | 0.01         | 0.4     | 0.69    |
| Residual                                                          | 17                           | 0.45           | 0.03         |         |         |
| Total                                                             | 22                           | 13.97          | 0.64         |         |         |
| <b>2-way ANOVA of leaf sap osmolality<sup>b</sup> (Figure 7B)</b> |                              |                |              |         |         |
| Treatment                                                         | 1                            | 2.36           | 2.36         | 919.5   | <0.001  |
| Genotype                                                          | 2                            | 0.57           | 0.28         | 110.5   | <0.001  |
| Genotype x treatment                                              | 2                            | 0.58           | 0.29         | 113.4   | <0.001  |
| Residual                                                          | 23                           | 0.06           | 0.003        |         |         |
| Total                                                             | 28                           | 3.74           | 0.13         |         |         |
| <b>All pairwise comparisons with Tukey's HSD test</b>             |                              |                |              |         |         |
| comparison                                                        | Proline content <sup>a</sup> |                | Osmolality   |         |         |
|                                                                   | q-value                      | p-value        | q-value      | p-value |         |
| Col-0, ctrl vs <i>p5cs1-4</i> , ctrl                              | 1.69                         | <0.01          | 0.006        | 1.00    |         |
| Col-0, ctrl vs <i>p5cs2-1</i> , ctrl                              | 5.83                         | 0.82           | 0.475        | 1.00    |         |
| Col-0, ctrl vs Col-0, NaCl                                        | 15.29                        | <0.01          | 41.356       | <0.001  |         |
| Col-0, ctrl vs <i>p5cs1-4</i> , NaCl                              | 11.72                        | <0.01          | 43.502       | <0.001  |         |
| Col-0, ctrl vs <i>p5cs1-4</i> , NaCl                              | 6.61                         | <0.01          | 15.127       | <0.001  |         |
| <i>p5cs1-4</i> , ctrl vs <i>p5cs2-1</i> , ctrl                    | 4.14                         | 0.08           | 0.468        | 1.00    |         |
| <i>p5cs1-4</i> , ctrl vs Col-0, NaCl                              | 16.98                        | <0.01          | 41.350       | <0.001  |         |
| <i>p5cs1-4</i> , ctrl vs <i>p5cs1-4</i> , NaCl                    | 13.28                        | <0.01          | 43.496       | <0.001  |         |
| <i>p5cs1-4</i> , ctrl vs <i>p5cs2-1</i> , NaCl                    | 8.30                         | <0.01          | 15.121       | <0.001  |         |
| <i>p5cs2-1</i> , ctrl vs Col-0, NaCl                              | 21.12                        | <0.01          | 40.881       | <0.001  |         |
| <i>p5cs2-1</i> , ctrl vs <i>p5cs1-4</i> , NaCl                    | 17.11                        | <0.01          | 43.028       | <0.001  |         |
| <i>p5cs2-1</i> , ctrl vs <i>p5cs2-1</i> , NaCl                    | 12.44                        | <0.01          | 14.679       | <0.001  |         |
| Col-0, NaCl vs <i>p5cs1-4</i> , NaCl                              | 2.44                         | <0.01          | 2.146        | 0.66    |         |
| Col-0, NaCl vs <i>p5cs2-1</i> , NaCl                              | 8.68                         | 0.53           | 23.864       | <0.001  |         |
| <i>p5cs1-4</i> , NaCl vs <i>p5cs2-1</i> , NaCl                    | 5.59                         | 0.01           | 25.888       | <0.001  |         |

<sup>a</sup> values were log-transformed to obtain normal distribution and equal variance

<sup>a</sup> values were  $\wedge^{-0.2}$ -transformed to obtain normal distribution and equal variance

**Supplementary Table S4B: Statistical analyses of solutes in mature rosette leaves of wildtype plants and *p5cs1* or *p5cs2* mutants under non-stressed and stressed conditions.**

| <b>2-way ANOVA of total cation concentration (Figure 7C)</b>                      |                                  |                       |                     |                  |                  |
|-----------------------------------------------------------------------------------|----------------------------------|-----------------------|---------------------|------------------|------------------|
| <b>Source of Variation</b>                                                        | <b>Degrees of freedom</b>        | <b>Sum of squares</b> | <b>Mean squares</b> | <b>F-value</b>   | <b>p-value</b>   |
| Treatment                                                                         | 1                                | 720175                | 720175              | 391.5            | <b>&lt;0.001</b> |
| Genotype                                                                          | 2                                | 246765                | 123383              | 67.1             | <b>&lt;0.001</b> |
| Genotype x treatment                                                              | 2                                | 235513                | 117757              | 64.0             | <b>&lt;0.001</b> |
| Residuals                                                                         | 24                               | 44150                 | 1840                |                  |                  |
| Total                                                                             | 29                               | 1246603               | 42986               |                  |                  |
| <b>Pairwise comparisons between genotypes or treatments with Tukey's HSD test</b> |                                  |                       |                     |                  |                  |
| <b>Fixed Factor</b>                                                               | <b>Comparison</b>                | <b>Diff. of Means</b> | <b>q-value</b>      | <b>p-value</b>   |                  |
| Col-0                                                                             | ctrl vs NaCl                     | 388.2                 | 20.24               | <b>&lt;0.001</b> |                  |
| <i>p5cs1-4</i>                                                                    |                                  | 476.9                 | 24.86               | <b>&lt;0.001</b> |                  |
| <i>p5cs2-1</i>                                                                    |                                  | 64.6                  | 3.37                | <b>0.03</b>      |                  |
| ctrl                                                                              | Col-0 vs <i>p5cs1-4</i>          | 12.53                 | 0.653               | 0.89             |                  |
|                                                                                   | Col-0 vs <i>p5cs2-1</i>          | 12.69                 | 0.661               | 0.89             |                  |
|                                                                                   | <i>p5cs1-4</i> vs <i>p5cs2-1</i> | 0.15                  | 0.008               | 1.00             |                  |
| NaCl                                                                              | Col-0 vs <i>p5cs1-4</i>          | 76.16                 | 3.970               | <b>0.03</b>      |                  |
|                                                                                   | Col-0 vs <i>p5cs2-1</i>          | 336.32                | 17.534              | <b>&lt;0.001</b> |                  |
|                                                                                   | <i>p5cs1-4</i> vs <i>p5cs2-1</i> | 412.48                | 21.504              | <b>&lt;0.001</b> |                  |

**Supplementary Table S5: Statistical analyses of pigment contents and pigment ratios in mature rosette leaves of wildtype plants and *p5cs1* or *p5cs2* mutants under non-stressed and stressed conditions.**

| Source of Variation                                        | Degrees of freedom               | Sum of squares               | Mean squares   | F-value                                  | p-value        |                    |                |
|------------------------------------------------------------|----------------------------------|------------------------------|----------------|------------------------------------------|----------------|--------------------|----------------|
| <b>2-way ANOVA of total pigment contents (Figure 8A)</b>   |                                  |                              |                |                                          |                |                    |                |
| Treatment                                                  | 1                                | 0.44                         | 0.44           | 14.49                                    | <0.001         |                    |                |
| Genotype                                                   | 2                                | 0.36                         | 0.18           | 5.86                                     | <0.01          |                    |                |
| Treatment x genotype                                       | 2                                | 1.04                         | 0.52           | 17.11                                    | <0.001         |                    |                |
| Residual                                                   | 24                               | 0.73                         | 0.03           |                                          |                |                    |                |
| <b>2-way ANOVA of Chl <i>a</i> / Chl <i>b</i> ratio</b>    |                                  |                              |                |                                          |                |                    |                |
| Treatment                                                  | 1                                | 0.44                         | 0.44           | 14.49                                    | <0.001         |                    |                |
| Genotype                                                   | 2                                | 0.36                         | 0.18           | 5.86                                     | <0.01          |                    |                |
| Treatment x genotype                                       | 2                                | 1.04                         | 0.52           | 17.11                                    | <0.001         |                    |                |
| Residual                                                   | 24                               | 0.73                         | 0.03           |                                          |                |                    |                |
| <b>Pairwise comparisons <sup>a</sup></b>                   |                                  | <b>Total pigment content</b> |                | <b>Chl <i>a</i> / Chl <i>b</i> ratio</b> |                |                    |                |
| <b>Fixed Factor</b>                                        | <b>Comparison</b>                | <b>q-value</b>               | <b>p-value</b> | <b>q-value</b>                           | <b>p-value</b> |                    |                |
| Col-0                                                      | ctrl vs. NaCl                    | 6.79                         | <0.001         | 8.28                                     | <0.001         |                    |                |
| <i>p5cs1-4</i>                                             |                                  | 6.17                         | <0.001         | 10.37                                    | <0.001         |                    |                |
| <i>p5cs2-1</i>                                             |                                  | 3.64                         | 0.02           | 2.93                                     | 0.05           |                    |                |
| ctrl                                                       | Col-0 vs <i>p5cs1-4</i>          | 0.85                         | 0.82           | 0.48                                     | 0.94           |                    |                |
|                                                            | Col-0 vs <i>p5cs2-1</i>          | 1.84                         | 0.41           | 0.32                                     | 0.97           |                    |                |
|                                                            | <i>p5cs1-4</i> vs <i>p5cs2-1</i> | 2.69                         | 0.16           | 0.17                                     | 0.99           |                    |                |
| NaCl                                                       | Col-0 vs <i>p5cs1-4</i>          | 1.46                         | 0.56           | 2.57                                     | 0.19           |                    |                |
|                                                            | Col-0 vs <i>p5cs2-1</i>          | 8.58                         | <0.001         | 5.04                                     | <0.01          |                    |                |
|                                                            | <i>p5cs1-4</i> vs <i>p5cs2-1</i> | 7.12                         | <0.001         | 7.61                                     | <0.001         |                    |                |
| <b>2-way ANOVA of Chl <i>a</i> content (Figure 8A)</b>     |                                  |                              |                |                                          |                |                    |                |
| Treatment                                                  | 1                                | 0.256                        | 0.256          | 25.66                                    | <0.001         |                    |                |
| Genotype                                                   | 2                                | 0.136                        | 0.068          | 6.83                                     | <0.01          |                    |                |
| Treatment x genotype                                       | 2                                | 0.412                        | 0.206          | 20.62                                    | <0.001         |                    |                |
| Residual                                                   | 24                               | 0.239                        | 0.010          |                                          |                |                    |                |
| <b>2-way ANOVA of Chl <i>b</i> content (Figure 8A)</b>     |                                  |                              |                |                                          |                |                    |                |
| Treatment                                                  | 1                                | 0.008                        | 0.008          | 5.23                                     | 0.03           |                    |                |
| Genotype                                                   | 2                                | 0.012                        | 0.006          | 4.18                                     | 0.03           |                    |                |
| Treatment x genotype                                       | 2                                | 0.040                        | 0.020          | 13.85                                    | <0.001         |                    |                |
| Residual                                                   | 24                               | 0.035                        | 0.001          |                                          |                |                    |                |
| <b>2-way ANOVA of total carotenoid content (Figure 8A)</b> |                                  |                              |                |                                          |                |                    |                |
| Treatment                                                  | 1                                | 0.006                        | 0.006          | 3.76                                     | 0.06           |                    |                |
| Genotype                                                   | 2                                | 0.014                        | 0.007          | 4.54                                     | 0.02           |                    |                |
| Treatment x genotype                                       | 2                                | 0.032                        | 0.016          | 10.31                                    | <0.001         |                    |                |
| Residual                                                   | 24                               | 0.037                        | 0.002          |                                          |                |                    |                |
| <b>Pairwise comparisons <sup>a</sup></b>                   |                                  | <b>Chl <i>a</i></b>          |                | <b>Chl <i>b</i></b>                      |                | <b>Carotenoids</b> |                |
| <b>Fixed Factor</b>                                        | <b>Comparison</b>                | <b>q-value</b>               | <b>p-value</b> | <b>q-value</b>                           | <b>p-value</b> | <b>q-value</b>     | <b>p-value</b> |
| Col-0                                                      | ctrl vs. NaCl                    | 7.97                         | <0.001         | 5.40                                     | <0.001         | 4.84               | <0.01          |
| <i>p5cs1-4</i>                                             |                                  | 7.72                         | <0.001         | 4.38                                     | <0.01          | 3.51               | 0.02           |
| <i>p5cs2-1</i>                                             |                                  | 3.28                         | 0.03           | 4.18                                     | <0.01          | 3.60               | 0.02           |
| ctrl                                                       | Col-0 vs <i>p5cs1-4</i>          | 0.80                         | 0.84           | 0.88                                     | 0.81           | 0.60               | 0.91           |
|                                                            | Col-0 vs <i>p5cs2-1</i>          | 2.06                         | 0.33           | 1.90                                     | 0.39           | 1.22               | 0.67           |
|                                                            | <i>p5cs1-4</i> vs <i>p5cs2-1</i> | 2.86                         | 0.13           | 2.78                                     | 0.14           | 1.82               | 0.42           |
| NaCl                                                       | Col-0 vs <i>p5cs1-4</i>          | 1.04                         | 0.74           | 1.90                                     | 0.39           | 1.94               | 0.37           |
|                                                            | Col-0 vs <i>p5cs2-1</i>          | 9.18                         | <0.001         | 7.68                                     | <0.001         | 7.23               | <0.001         |
|                                                            | <i>p5cs1-4</i> vs <i>p5cs2-1</i> | 8.14                         | <0.001         | 5.78                                     | <0.01          | 5.29               | <0.01          |

<sup>a</sup> within fixed factors by Tukey's HSD test

**Supplementary Table S6: Statistical analyses of photosynthetic parameters in mature rosette leaves of wildtype plants and *p5cs1* or *p5cs2* mutants under non-stressed and stressed conditions.**

| Source of Variation                                      |                                   | Degrees of freedom | Sum of squares | Mean squares     | F-value       | p-value |                  |
|----------------------------------------------------------|-----------------------------------|--------------------|----------------|------------------|---------------|---------|------------------|
| <b>2-way ANOVA of (ETR/36.5)<sup>2</sup> (Figure 8B)</b> |                                   |                    |                |                  |               |         |                  |
| Treatment                                                |                                   | 3                  | 0.311          | 0.104            | 163.40        | <0.001  |                  |
| Genotype                                                 |                                   | 2                  | 0.049          | 0.024            | 38.45         | <0.001  |                  |
| Treatment x genotype                                     |                                   | 6                  | 0.049          | 0.008            | 12.99         | <0.001  |                  |
| Residual                                                 |                                   | 36                 | 0.023          | 0.001            |               |         |                  |
| <b>2-way ANOVA of NPQ (Figure 8C)</b>                    |                                   |                    |                |                  |               |         |                  |
| Treatment                                                |                                   | 3                  | 0.376          | 0.125            | 58.36         | <0.001  |                  |
| Genotype                                                 |                                   | 2                  | 0.046          | 0.023            | 10.73         | <0.001  |                  |
| Treatment x genotype                                     |                                   | 6                  | 0.130          | 0.022            | 10.13         | <0.001  |                  |
| Residual                                                 |                                   | 36                 | 0.077          | 0.002            |               |         |                  |
| <b>Pairwise comparisons <sup>a</sup></b>                 |                                   | <b>ETR</b>         |                |                  | <b>NPQ</b>    |         |                  |
| Fixed Factor                                             | Comparison                        | Diff of Means      | t-value        | p-value          | Diff of Means | t-value | p-value          |
| LL                                                       | Col-0 vs. <i>p5cs1-4</i>          | 0.010              | 0.58           | 0.83             | -0.004        | -0.12   | 0.99             |
|                                                          | Col-0 vs. <i>p5cs2-1</i>          | -0.003             | -0.17          | 0.98             | 0.048         | 1.47    | 0.32             |
|                                                          | <i>p5cs1-4</i> vs. <i>p5cs2-1</i> | -0.013             | -0.76          | 0.73             | 0.052         | 1.59    | 0.26             |
| EL                                                       | Col-0 vs. <i>p5cs1-4</i>          | 0.019              | 1.06           | 0.55             | 0.008         | 0.24    | 0.97             |
|                                                          | Col-0 vs. <i>p5cs2-1</i>          | -0.011             | -0.59          | 0.83             | 0.022         | 0.67    | 0.78             |
|                                                          | <i>p5cs1-4</i> vs. <i>p5cs2-1</i> | -0.029             | -1.65          | 0.24             | 0.014         | 0.43    | 0.90             |
| LL + NaCl                                                | Col-0 vs. <i>p5cs1-4</i>          | 0.016              | 0.89           | 0.65             | -0.066        | -2.02   | 0.12             |
|                                                          | Col-0 vs. <i>p5cs2-1</i>          | -0.053             | -2.98          | <b>0.01</b>      | -0.167        | -5.10   | <b>&lt;0.001</b> |
|                                                          | <i>p5cs1-4</i> vs. <i>p5cs2-1</i> | -0.069             | -3.87          | <b>&lt;0.01</b>  | -0.101        | -3.08   | <b>0.01</b>      |
| EL + NaCl                                                | Col-0 vs. <i>p5cs1-4</i>          | -0.005             | -0.30          | 0.95             | 0.066         | 2.03    | 0.12             |
|                                                          | Col-0 vs. <i>p5cs2-1</i>          | -0.182             | -10.21         | <b>&lt;0.001</b> | -0.164        | -4.99   | <b>&lt;0.001</b> |
|                                                          | <i>p5cs1-4</i> vs. <i>p5cs2-1</i> | -0.176             | -9.91          | <b>&lt;0.001</b> | -0.230        | -7.02   | <b>&lt;0.001</b> |
| Col-0                                                    | LL vs. EL                         | 0.071              | 3.99           | <b>&lt;0.01</b>  | 0.180         | 5.50    | <b>&lt;0.001</b> |
|                                                          | LL vs. LL+NaCl                    | 0.089              | 5.00           | <b>&lt;0.001</b> | 0.139         | 4.25    | <b>&lt;0.001</b> |
|                                                          | LL vs. EL+NaCl                    | 0.286              | 16.06          | <b>&lt;0.001</b> | 0.262         | 7.99    | <b>&lt;0.001</b> |
|                                                          | EL vs. LL+NaCl                    | 0.018              | 1.02           | 0.74             | -0.041        | -1.25   | 0.60             |
|                                                          | EL vs. EL+NaCl                    | 0.215              | 12.08          | <b>&lt;0.001</b> | 0.082         | 2.49    | 0.08             |
|                                                          | LL+NaCl vs. EL+NaCl               | 0.197              | 11.06          | <b>&lt;0.001</b> | 0.123         | 3.74    | <b>&lt;0.01</b>  |
| <i>p5cs1-4</i>                                           | LL vs. EL                         | 0.079              | 4.47           | <b>&lt;0.001</b> | 0.192         | 5.86    | <b>&lt;0.001</b> |
|                                                          | LL vs. LL+NaCl                    | 0.095              | 5.31           | <b>&lt;0.001</b> | 0.077         | 2.35    | 0.11             |
|                                                          | LL vs. EL+NaCl                    | 0.270              | 15.18          | <b>&lt;0.001</b> | 0.332         | 10.14   | <b>&lt;0.001</b> |
|                                                          | EL vs. LL+NaCl                    | 0.015              | 0.85           | 0.83             | -0.115        | -3.51   | <b>&lt;0.01</b>  |
|                                                          | EL vs. EL+NaCl                    | 0.191              | 10.71          | <b>&lt;0.001</b> | 0.140         | 4.27    | <b>&lt;0.001</b> |
|                                                          | LL+NaCl vs. EL+NaCl               | 0.176              | 9.87           | <b>&lt;0.001</b> | 0.255         | 7.79    | <b>&lt;0.001</b> |
| <i>p5cs2-1</i>                                           | LL vs. EL                         | 0.064              | 3.57           | <b>&lt;0.01</b>  | 0.154         | 4.70    | <b>&lt;0.001</b> |
|                                                          | LL vs. LL+NaCl                    | 0.039              | 2.20           | 0.14             | -0.076        | -2.32   | 0.11             |
|                                                          | LL vs. EL+NaCl                    | 0.107              | 6.03           | <b>&lt;0.001</b> | 0.050         | 1.53    | 0.43             |
|                                                          | EL vs. LL+NaCl                    | -0.024             | -1.37          | 0.52             | -0.230        | -7.02   | <b>&lt;0.001</b> |
|                                                          | EL vs. EL+NaCl                    | 0.044              | 2.46           | 0.08             | -0.104        | -3.18   | <b>0.02</b>      |
|                                                          | LL+NaCl vs. EL+NaCl               | 0.068              | 3.83           | <b>&lt;0.01</b>  | 0.126         | 3.85    | <b>&lt;0.01</b>  |

<sup>a</sup> with general linear hypotheses

| Source of Variation                                                            | Degrees of freedom | Sum of squares | Mean squares | F-value | p-value          |
|--------------------------------------------------------------------------------|--------------------|----------------|--------------|---------|------------------|
| <b>2-way ANOVA of (F<sub>v</sub>/F<sub>m</sub>)<sup>2.8</sup> (Figure S6A)</b> |                    |                |              |         |                  |
| Treatment                                                                      | 3                  | 1.227          | 0.409        | 193.23  | <b>&lt;0.001</b> |
| Genotype                                                                       | 2                  | 0.126          | 0.063        | 29.87   | <b>&lt;0.001</b> |
| Treatment x genotype                                                           | 6                  | 0.143          | 0.024        | 11.29   | <b>&lt;0.001</b> |
| Residual                                                                       | 36                 | 0.076          | 0.002        |         |                  |
| <b>2-way ANOVA of asin((Φ PSII)<sup>2</sup>) (Figure S6B)</b>                  |                    |                |              |         |                  |
| Treatment                                                                      | 3                  | 0.453          | 0.151        | 147.1   | <b>&lt;0.001</b> |
| Genotype                                                                       | 2                  | 0.057          | 0.029        | 28.0    | <b>&lt;0.001</b> |
| Treatment x genotype                                                           | 6                  | 0.065          | 0.011        | 10.6    | <b>&lt;0.001</b> |
| Residual                                                                       | 36                 | 0.037          | 0.001        |         |                  |
| <b>2-way ANOVA of (logit(PAR absorptivity))<sup>3</sup> (Figure S6C)</b>       |                    |                |              |         |                  |
| Treatment                                                                      | 3                  | 0.702          | 0.234        | 13.41   | <b>&lt;0.001</b> |
| Genotype                                                                       | 2                  | 0.639          | 0.319        | 18.31   | <b>&lt;0.001</b> |
| Treatment x genotype                                                           | 6                  | 0.476          | 0.079        | 4.55    | <b>&lt;0.01</b>  |
| Residual                                                                       | 36                 | 0.628          | 0.017        |         |                  |

| Pairwise comparisons <sup>a</sup> |                                   | F <sub>v</sub> /F <sub>m</sub> |         |                  | Φ PSII        |         |                  | Absorptivity  |         |                  |
|-----------------------------------|-----------------------------------|--------------------------------|---------|------------------|---------------|---------|------------------|---------------|---------|------------------|
| Fixed Factor                      | Comparison                        | Diff of Means                  | t-value | p-value          | Diff of Means | t-value | p-value          | Diff of Means | t-value | p-value          |
| LL                                | Col-0 vs. <i>p5cs1-4</i>          | 0.015                          | 0.46    | 0.89             | 0.015         | 0.65    | 0.79             | -0.042        | -0.45   | 0.90             |
|                                   | Col-0 vs. <i>p5cs2-1</i>          | 0.010                          | 0.30    | 0.95             | -0.004        | -0.17   | 0.98             | -0.011        | -0.11   | 0.99             |
|                                   | <i>p5cs1-4</i> vs. <i>p5cs2-1</i> | -0.005                         | -0.16   | 0.99             | -0.019        | -0.82   | 0.69             | 0.031         | 0.33    | 0.94             |
| EL                                | Col-0 vs. <i>p5cs1-4</i>          | 0.038                          | 1.16    | 0.49             | 0.022         | 0.96    | 0.61             | 0.036         | 0.39    | 0.92             |
|                                   | Col-0 vs. <i>p5cs2-1</i>          | -0.003                         | -0.09   | 1.00             | -0.009        | -0.39   | 0.92             | -0.110        | -1.18   | 0.47             |
|                                   | <i>p5cs1-4</i> vs. <i>p5cs2-1</i> | -0.040                         | -1.24   | 0.44             | -0.030        | -1.34   | 0.38             | -0.147        | -1.57   | 0.27             |
| LL + NaCl                         | Col-0 vs. <i>p5cs1-4</i>          | 0.047                          | 1.44    | 0.33             | 0.015         | 0.66    | 0.79             | 0.066         | 0.71    | 0.76             |
|                                   | Col-0 vs. <i>p5cs2-1</i>          | -0.100                         | -3.08   | <b>0.01</b>      | -0.049        | -2.18   | 0.09             | -0.282        | -3.02   | <b>0.01</b>      |
|                                   | <i>p5cs1-4</i> vs. <i>p5cs2-1</i> | -0.147                         | -4.52   | <b>&lt;0.001</b> | -0.064        | -2.83   | <b>0.02</b>      | -0.349        | -3.73   | <b>&lt;0.01</b>  |
| EL + NaCl                         | Col-0 vs. <i>p5cs1-4</i>          | -0.018                         | -0.56   | 0.84             | -0.011        | -0.49   | 0.88             | 0.167         | 1.79    | 0.19             |
|                                   | Col-0 vs. <i>p5cs2-1</i>          | -0.296                         | -9.10   | <b>&lt;0.001</b> | -0.209        | -9.24   | <b>&lt;0.001</b> | -0.441        | -4.72   | <b>&lt;0.001</b> |
|                                   | <i>p5cs1-4</i> vs. <i>p5cs2-1</i> | -0.278                         | -8.54   | <b>&lt;0.001</b> | -0.198        | -8.76   | <b>&lt;0.001</b> | -0.608        | -6.52   | <b>&lt;0.001</b> |
| Col-0                             | LL vs. EL                         | 0.240                          | 7.38    | <b>&lt;0.001</b> | 0.088         | 3.89    | <b>&lt;0.01</b>  | -0.035        | -0.37   | 0.98             |
|                                   | LL vs. LL+NaCl                    | 0.169                          | 5.19    | <b>&lt;0.001</b> | 0.093         | 4.08    | <b>&lt;0.01</b>  | 0.300         | 3.22    | <b>0.01</b>      |
|                                   | LL vs. EL+NaCl                    | 0.552                          | 16.98   | <b>&lt;0.001</b> | 0.343         | 15.12   | <b>&lt;0.001</b> | 0.258         | 2.76    | <b>0.04</b>      |
|                                   | EL vs. LL+NaCl                    | -0.071                         | -2.19   | 0.14             | 0.004         | 0.19    | 1.00             | 0.335         | 3.59    | <b>&lt;0.01</b>  |
|                                   | EL vs. EL+NaCl                    | 0.312                          | 9.60    | <b>&lt;0.001</b> | 0.254         | 11.23   | <b>&lt;0.001</b> | 0.293         | 3.14    | <b>0.02</b>      |
|                                   | LL+NaCl vs. EL+NaCl               | 0.384                          | 11.79   | <b>&lt;0.001</b> | 0.250         | 11.04   | <b>&lt;0.001</b> | -0.043        | -0.46   | 0.97             |
| <i>p5cs1-4</i>                    | LL vs. EL                         | 0.263                          | 8.07    | <b>&lt;0.001</b> | 0.095         | 4.20    | <b>&lt;0.001</b> | 0.043         | 0.46    | 0.97             |
|                                   | LL vs. LL+NaCl                    | 0.201                          | 6.16    | <b>&lt;0.001</b> | 0.093         | 4.09    | <b>&lt;0.01</b>  | 0.408         | 4.37    | <b>&lt;0.001</b> |
|                                   | LL vs. EL+NaCl                    | 0.519                          | 15.96   | <b>&lt;0.001</b> | 0.317         | 13.98   | <b>&lt;0.001</b> | 0.467         | 5.00    | <b>&lt;0.001</b> |
|                                   | EL vs. LL+NaCl                    | -0.062                         | -1.91   | 0.24             | -0.002        | -0.11   | 1.00             | 0.365         | 3.91    | <b>&lt;0.01</b>  |
|                                   | EL vs. EL+NaCl                    | 0.256                          | 7.88    | <b>&lt;0.001</b> | 0.222         | 9.79    | <b>&lt;0.001</b> | 0.424         | 4.54    | <b>&lt;0.001</b> |
|                                   | LL+NaCl vs. EL+NaCl               | 0.319                          | 9.79    | <b>&lt;0.001</b> | 0.224         | 9.90    | <b>&lt;0.001</b> | 0.059         | 0.63    | 0.92             |
| <i>p5cs2-1</i>                    | LL vs. EL                         | 0.228                          | 6.99    | <b>&lt;0.001</b> | 0.083         | 3.68    | <b>&lt;0.01</b>  | -0.135        | -1.44   | 0.48             |
|                                   | LL vs. LL+NaCl                    | 0.059                          | 1.81    | 0.29             | 0.047         | 2.08    | 0.18             | 0.029         | 0.31    | 0.99             |
|                                   | LL vs. EL+NaCl                    | 0.246                          | 7.57    | <b>&lt;0.001</b> | 0.137         | 6.05    | <b>&lt;0.001</b> | -0.173        | -1.85   | 0.27             |
|                                   | EL vs. LL+NaCl                    | -0.169                         | -5.19   | <b>&lt;0.001</b> | -0.036        | -1.60   | 0.39             | 0.163         | 1.75    | 0.31             |
|                                   | EL vs. EL+NaCl                    | 0.019                          | 0.58    | 0.94             | 0.054         | 2.37    | 0.10             | -0.038        | -0.41   | 0.98             |
|                                   | LL+NaCl vs. EL+NaCl               | 0.188                          | 5.77    | <b>&lt;0.001</b> | 0.090         | 3.97    | <b>&lt;0.01</b>  | -0.201        | -2.15   | 0.16             |

<sup>a</sup> with general linear hypotheses
