# Supplementary material for: Differential Contribution of P5CS Isoforms to Stress Tolerance in Arabidopsis
Source: PubMed Central journal article supplement (PMC7545825; doi:10.3389/fpls.2020.565134), 2020-09-25
Supplement: Image_2.pdf [file Image_2.pdf]

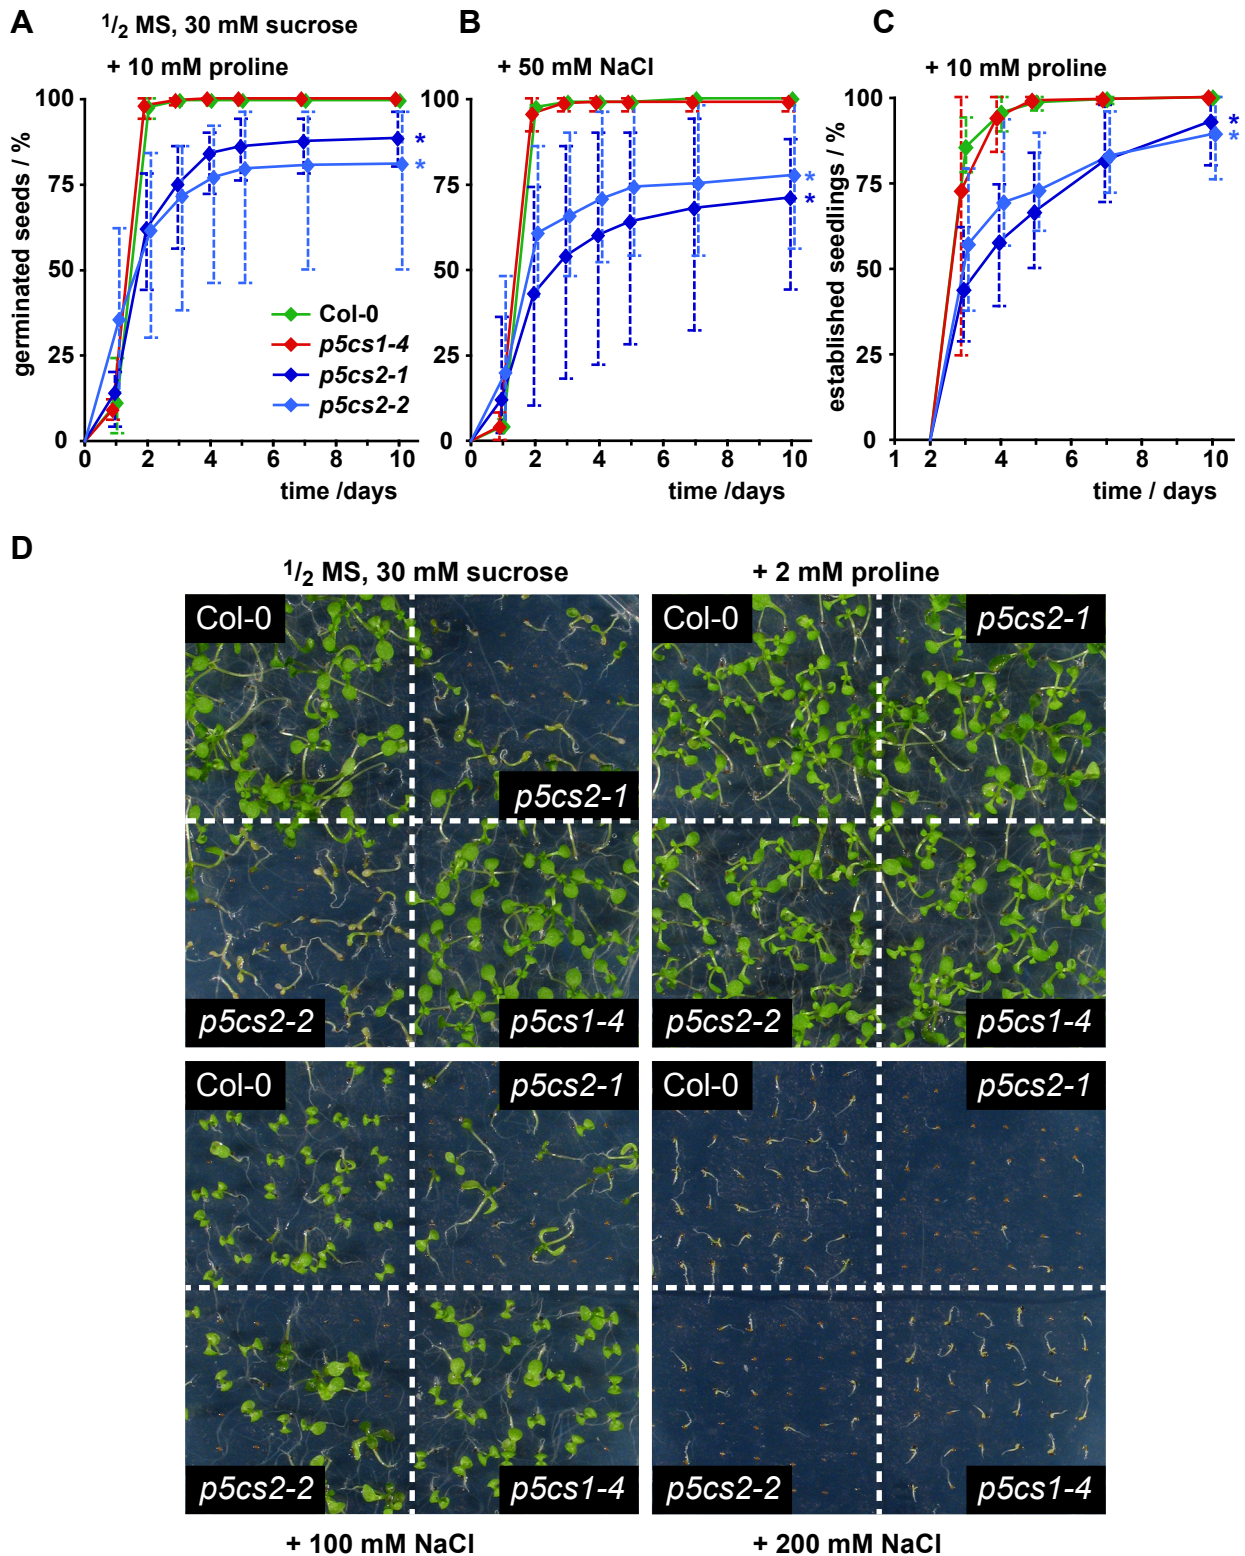

### Supplementary Figure S2: Germination and establishment of *p5cs* mutants

Proportions of germinated seeds were determined between 1 and 10 days after plating of seeds on axenic half-strength MS medium containing 30 mM sucrose supplemented with either 10 mM proline (A) or 50 mM NaCl (B). Seedling establishment was determined between 2 and 10 days after plating of seeds on medium supplemented with 10 mM proline (C). Only seedlings with fully expanded, green cotyledons were scored as “established”. Diamonds represent mean proportions of germinated seeds or established seedlings from 4 batches, consisting of 50 seeds each, from individual parental plants. Whiskers extend to the highest and lowest values in each sample and asterisks indicate values that were significantly different from Col-0 at day 10 ( $p < 0.05$  by Fisher’s exact test). **D**: Photographs of representative plates after 10 days under short-day conditions.
