# Supplementary material for: Differential Contribution of P5CS Isoforms to Stress Tolerance in Arabidopsis
Source: PubMed Central journal article supplement (PMC7545825; doi:10.3389/fpls.2020.565134), 2020-09-25
Supplement: Image_6.pdf [file Image_6.pdf]

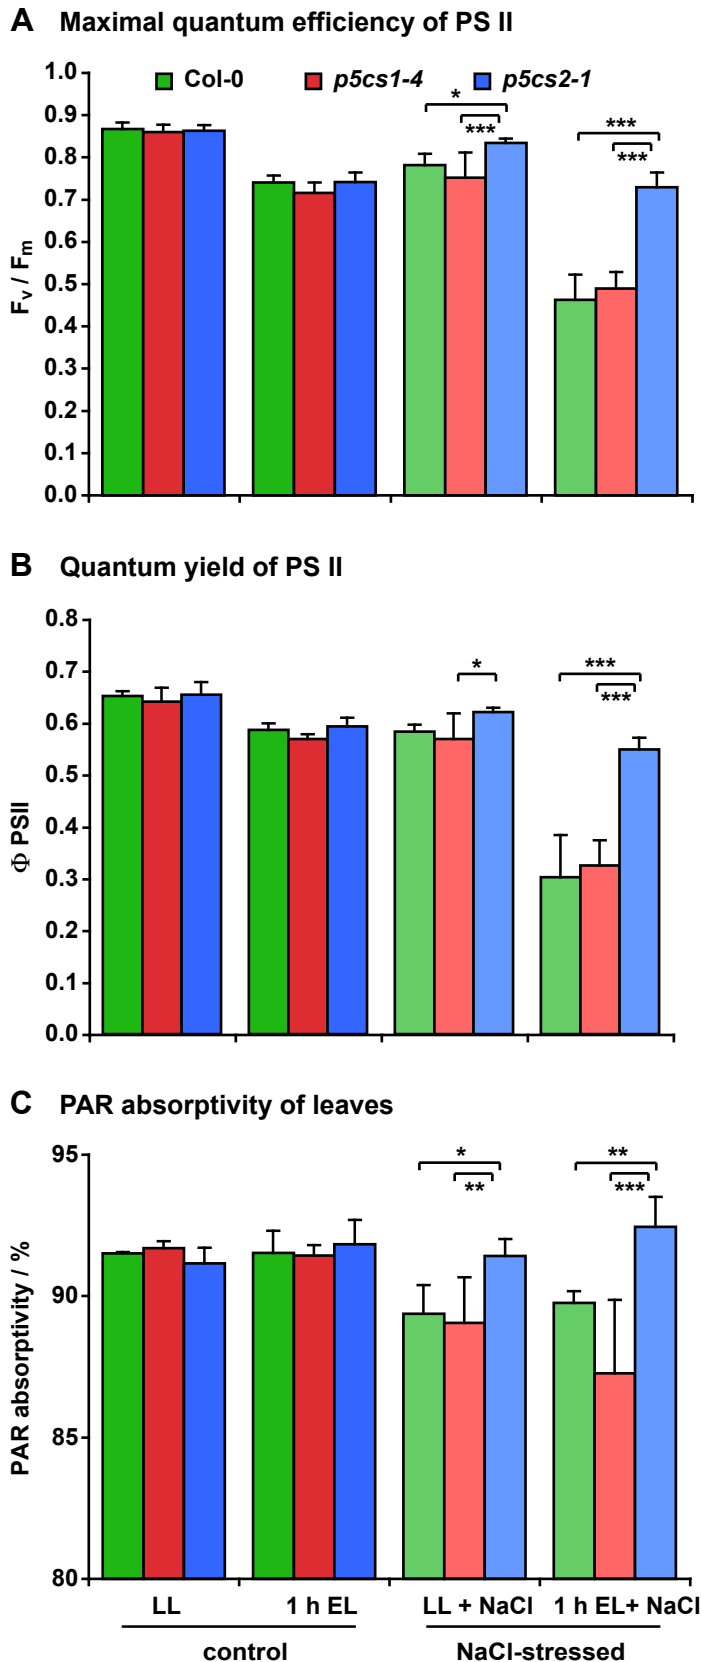

**Supplementary Figure S6: Photosynthetic parameters after salt and excess light stress**

Six-week-old plants were stressed with 300 mM NaCl 4 and 2 days before the analysis. The same measurements of chlorophyll fluorescence before and after 1 h exposure to excess light stress as described in Figure 8 were used to calculate the maximal quantum efficiency of PS II in the dark acclimated state ( $F_v/F_m$ ; **A**), the quantum yield of PS II in the light acclimated state ( $\Phi_{PSII}$ , **B**). The absorptivity for photosynthetically active radiation (PAR absorptivity, **C**) was estimated from images of reflected red and near infrared light. Bars represent the average  $\pm$ SD of 4 or 5 replicates per condition and genotype. ANOVA analysis detected significant differences depending on treatment, genotype and treatment  $\times$  genotype interaction in all three panels (**Supplementary table S6**). Briefly, both NaCl stress and excess light treatment reduced  $F_v/F_m$  and  $\Phi_{PSII}$  in all genotypes, but *p5cs2-1* mutants were significantly less affected. Absorptivity of photosynthetically active radiation was reduced by NaCl stress but not by excess light treatment in Col-0 and *p5cs1-4* mutants, whereas *p5cs2-1* mutants were unaffected. Asterisks indicate significant differences between genotypes within one condition (\*; \*\*, \*\*\*:  $p < 0.5$ ,  $< 0.01$ , and  $< 0.001$ , respectively).
